# Supplementary material
Source: Research Square preprint supplement (doi:10.21203/rs.3.rs-9225233/v1)
Supplement: Supplementary file 1 [file c6c0bf68bae98934df69a1bb.pdf]

# **Enhanced Antimicrobial Photodynamic Therapy against *Escherichia coli* Using MXene-Based Silver–Curcumin 2D Nanocomposite Photosensitizers**

Saliha noor<sup>1#</sup>, Shahzad Anwar<sup>2</sup>,Rafaqat Ali Khan<sup>2#</sup>, Sawera Malik<sup>3</sup>, Hina Ali<sup>2</sup>, Farwa Nurjis<sup>2</sup>, Shaista Taimur<sup>4</sup>, Muhammad Iftakhar<sup>1</sup>, Muhammad Saleem<sup>2</sup>, Babar Manzoor Atta<sup>2</sup>

<sup>1</sup>Faculty of Basic and Applied Sciences, University of Poonch, Rawalakot

<sup>2</sup>National Institute of Lasers and Optronics College, Pakistan Institute of Engineering and Applied Sciences, Islamabad 45650, Pakistan

<sup>3</sup>Interdisciplinary Research Centre in Biomedical Materials, COMSATS University Islamabad, Lahore Campus, Lahore 54000, Pakistan

<sup>4</sup>Department of Chemistry, Pakistan Institute of Engineering and Applied Sciences, PO Nilore, Islamabad, 45650, Pakistan

## **Supplementary data:**

**Table S1.** Inoculums of *E. coli* incubated with MXene, silver, curcumin and MXene -silver-curcumin NCs for 24 hours, and agar plates were used for the calculations of Zone of inhibition.

| Sr. | Materials | Inhibition Zone (mm) for <i>E. coli</i> MXene-silver-curcumin Nano particles |       |       | Average     |
|-----|-----------|------------------------------------------------------------------------------|-------|-------|-------------|
|     |           | 1                                                                            | 2     | 3     |             |
| 1.  | MXene     | 0                                                                            | 0     | 0     | 0           |
| 2.  | Silver    | 14.69                                                                        | 13.22 | 14.18 | 14.03±0.74  |
| 3.  | Curcumin  | 0                                                                            | 0     | 0     | 0           |
| 4.  | Composite | 14.85                                                                        | 12.93 | 14.01 | 13.93± 0.90 |

**Table S2.** Inoculums of *E. coli* incubated with MXene -silver-curcumin NCs different concentrations for 24 hours, and agar plates were used for the calculations of Zone of inhibition.

| Sr. | Concentration (µl/ml) | Inhibition Zone (mm) for <i>E. coli</i> MXene-silver-curcumin NCs |       |       | Average     |
|-----|-----------------------|-------------------------------------------------------------------|-------|-------|-------------|
|     |                       | 1                                                                 | 2     | 3     |             |
| 1.  | 500                   | 15.01                                                             | 15.67 | 15.75 | 15.47± 0.40 |
| 2.  | 250                   | 14.74                                                             | 14.41 | 14.01 | 14.38± 0.36 |
| 3.  | 125                   | 13.39                                                             | 13.21 | 12.98 | 13.19± 0.20 |
| 4.  | 62                    | 12.12                                                             | 11.01 | 11.87 | 11.61± 0.58 |
| 5.  | 31                    | 9.75                                                              | 8.01  | 9.31  | 9.01± 0.90  |

**Table S3** CFU/mL values composite against *E. coli*.

| Sr. | Concentration<br>( $\mu\text{g/ml}$ ) | Time<br>(Min) | (CFU/ml) against <i>E. coli</i> |       |        | Average                               |
|-----|---------------------------------------|---------------|---------------------------------|-------|--------|---------------------------------------|
|     |                                       |               | 1                               | 2     | 3      |                                       |
| 1   | 500                                   | 10            | 1.8E6                           | 1.7E6 | 1.6E6  | $1.7 \times 10^6 \pm 1.0 \times 10^5$ |
|     |                                       | 20            | 10.0E4                          | 9.0E4 | 11.0E4 | $1.0 \times 10^5 \pm 1.0 \times 10^4$ |
|     |                                       | 30            | 2.0E4                           | 1.0E4 | 2.0E4  | $1.6 \times 10^4 \pm 5.7 \times 10^3$ |
|     |                                       | 40            | 1.0E4                           | 2.0E4 | 1.0E4  | $1.3 \times 10^4 \pm 5.7 \times 10^3$ |
|     |                                       | 50            | 0                               | 0     | 0      | 0 $\pm$ 0                             |
|     |                                       | 60            | 0                               | 0     | 0      | 0 $\pm$ 0                             |
| 2   | 250                                   | 10            | 4.9E6                           | 4.6E6 | 4.9E6  | $4.8 \times 10^6 \pm 1.7 \times 10^5$ |
|     |                                       | 20            | 1.0E6                           | 1.1E6 | 1.2E6  | $1.1 \times 10^6 \pm 1.0 \times 10^5$ |
|     |                                       | 30            | 2.6E5                           | 2.8E5 | 2.4E5  | $2.6 \times 10^5 \pm 2.0 \times 10^4$ |
|     |                                       | 40            | 8.0E4                           | 9.0E4 | 7.0E4  | $8.0 \times 10^4 \pm 1.0 \times 10^4$ |
|     |                                       | 50            | 0                               | 0     | 0      | 0 $\pm$ 0                             |
|     |                                       | 60            | 0                               | 0     | 0      | 0 $\pm$ 0                             |
| 3   | 125                                   | 10            | 4.4E6                           | 4.5E6 | 4.6E6  | $4.5 \times 10^6 \pm 1.0 \times 10^5$ |
|     |                                       | 20            | 2.8E6                           | 2.9E6 | 2.7E6  | $2.8 \times 10^6 \pm 1.0 \times 10^5$ |
|     |                                       | 30            | 1.0E6                           | 1.4E6 | 1.2E6  | $1.2 \times 10^6 \pm 2.0 \times 10^5$ |
|     |                                       | 40            | 3.3E5                           | 3.4E5 | 3.7E5  | $3.4 \times 10^5 \pm 2.0 \times 10^4$ |
|     |                                       | 50            | 1.2E5                           | 1.5E5 | 1.2E5  | $1.3 \times 10^5 \pm 1.7 \times 10^4$ |

|   |    |    |       |       |       |                                          |
|---|----|----|-------|-------|-------|------------------------------------------|
|   |    | 60 | 0     | 0     | 0     | 0±0                                      |
| 4 | 62 | 10 | 6.8E6 | 6.7E6 | 6.6E6 | 6.7×10 <sup>6</sup> ±1.0×10 <sup>5</sup> |
|   |    | 20 | 5.1E6 | 5.2E6 | 5.2E6 | 5.1×10 <sup>6</sup> ±5.7×10 <sup>5</sup> |
|   |    | 30 | 7.2E5 | 7.4E5 | 7.3E5 | 7.3×10 <sup>5</sup> ±1.0×10 <sup>4</sup> |
|   |    | 40 | 1.5E5 | 1.8E5 | 2.1E5 | 1.8×10 <sup>5</sup> ±1.0×10 <sup>5</sup> |
|   |    | 50 | 5.0E4 | 6.0E4 | 7.0E4 | 6.0×10 <sup>4</sup> ±1.0×10 <sup>4</sup> |
|   |    | 60 | 1.0E4 | 3.0E4 | 5.0E4 | 3.0×10 <sup>4</sup> ±2.0×10 <sup>4</sup> |
| 5 | 31 | 10 | 6.9E6 | 6.7E6 | 7.1E6 | 6.9×10 <sup>6</sup> ±1.0×10 <sup>5</sup> |
|   |    | 20 | 2.6E6 | 2.7E6 | 2.5E6 | 2.6×10 <sup>6</sup> ±1.0×10 <sup>5</sup> |
|   |    | 30 | 3.0E5 | 3.1E5 | 2.9E5 | 3.0×10 <sup>5</sup> ±1.0×10 <sup>4</sup> |
|   |    | 40 | 2.5E5 | 2.6E5 | 2.4E5 | 2.5×10 <sup>5</sup> ±1.0×10 <sup>4</sup> |
|   |    | 50 | 1.4E5 | 1.3E5 | 1.5E5 | 1.4×10 <sup>5</sup> ±1.0×10 <sup>4</sup> |
|   |    | 60 | 5.0E4 | 6.0E4 | 4.0E4 | 5.0×10 <sup>4</sup> ±1.0×10 <sup>4</sup> |

**Table S4 Cell lines:**

| Concentration (µg/mL) | Absorbance (550 nm) | % Viability            | Error bar |
|-----------------------|---------------------|------------------------|-----------|
| 0 (Control)           | 1.245               | 100%                   | ±1.0      |
| 31                    | 1.146               | (1.14/1.245)×100 = 92% | ±1.2      |
| 62                    | 1.09                | 87%                    | ±0.9      |
| 125                   | 0.987               | 79%                    | ±1.1      |
| 250                   | 0.894               | 72%                    | ±0.8      |

| <b>Concentration (<math>\mu\text{g/mL}</math>)</b> | <b>Absorbance (550 nm)</b> | <b>% Viability</b> | <b>Error bar</b> |
|----------------------------------------------------|----------------------------|--------------------|------------------|
| 500                                                | 0.757                      | 61%                | $\pm 1.1$        |
